# Supplementary material
Source: publisher figshare collection journal article supplement (https://frontiersin.figshare.com/ndownloader/files/12884618)
Supplement: Supplementary file [file 12884618]

Fig.S1

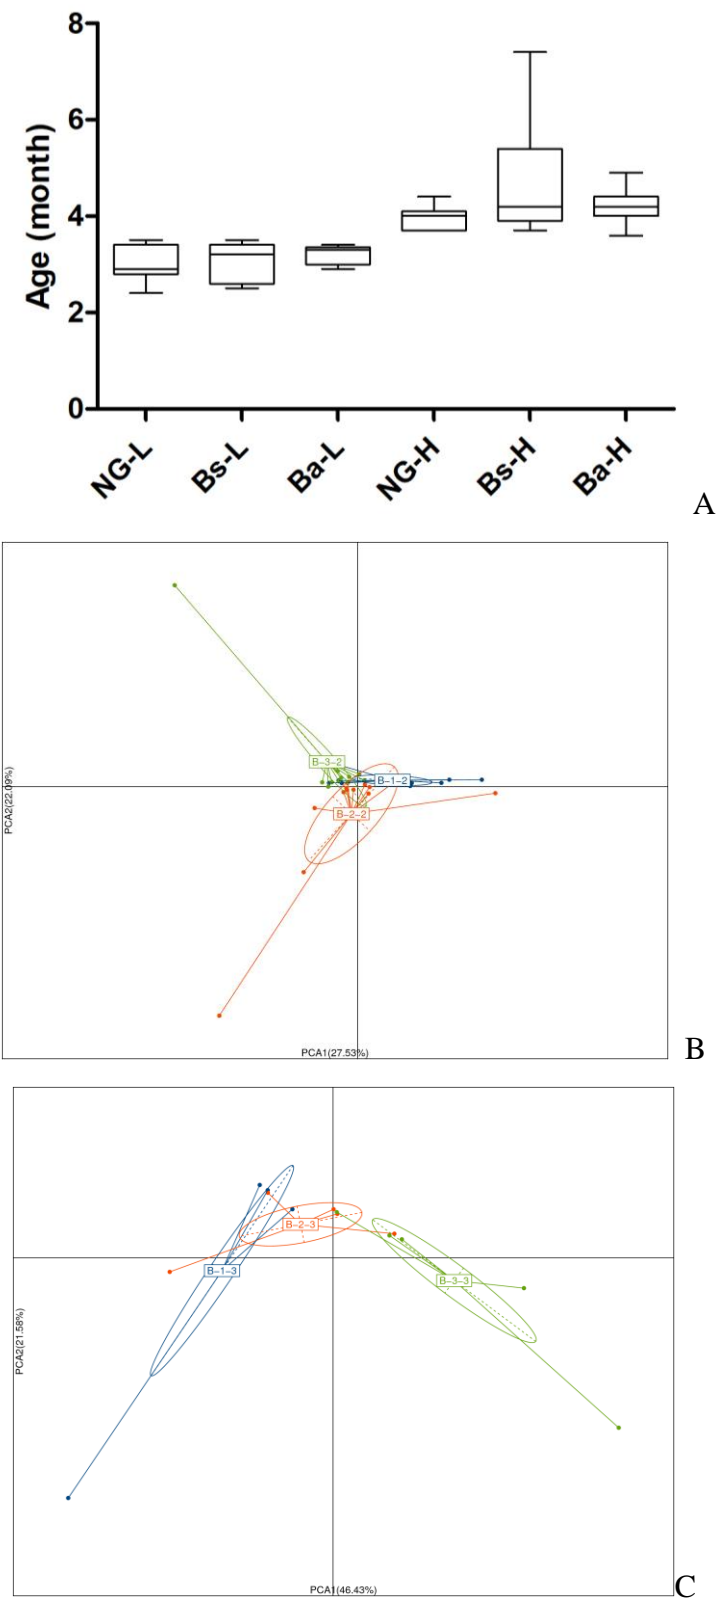

Fig.S2

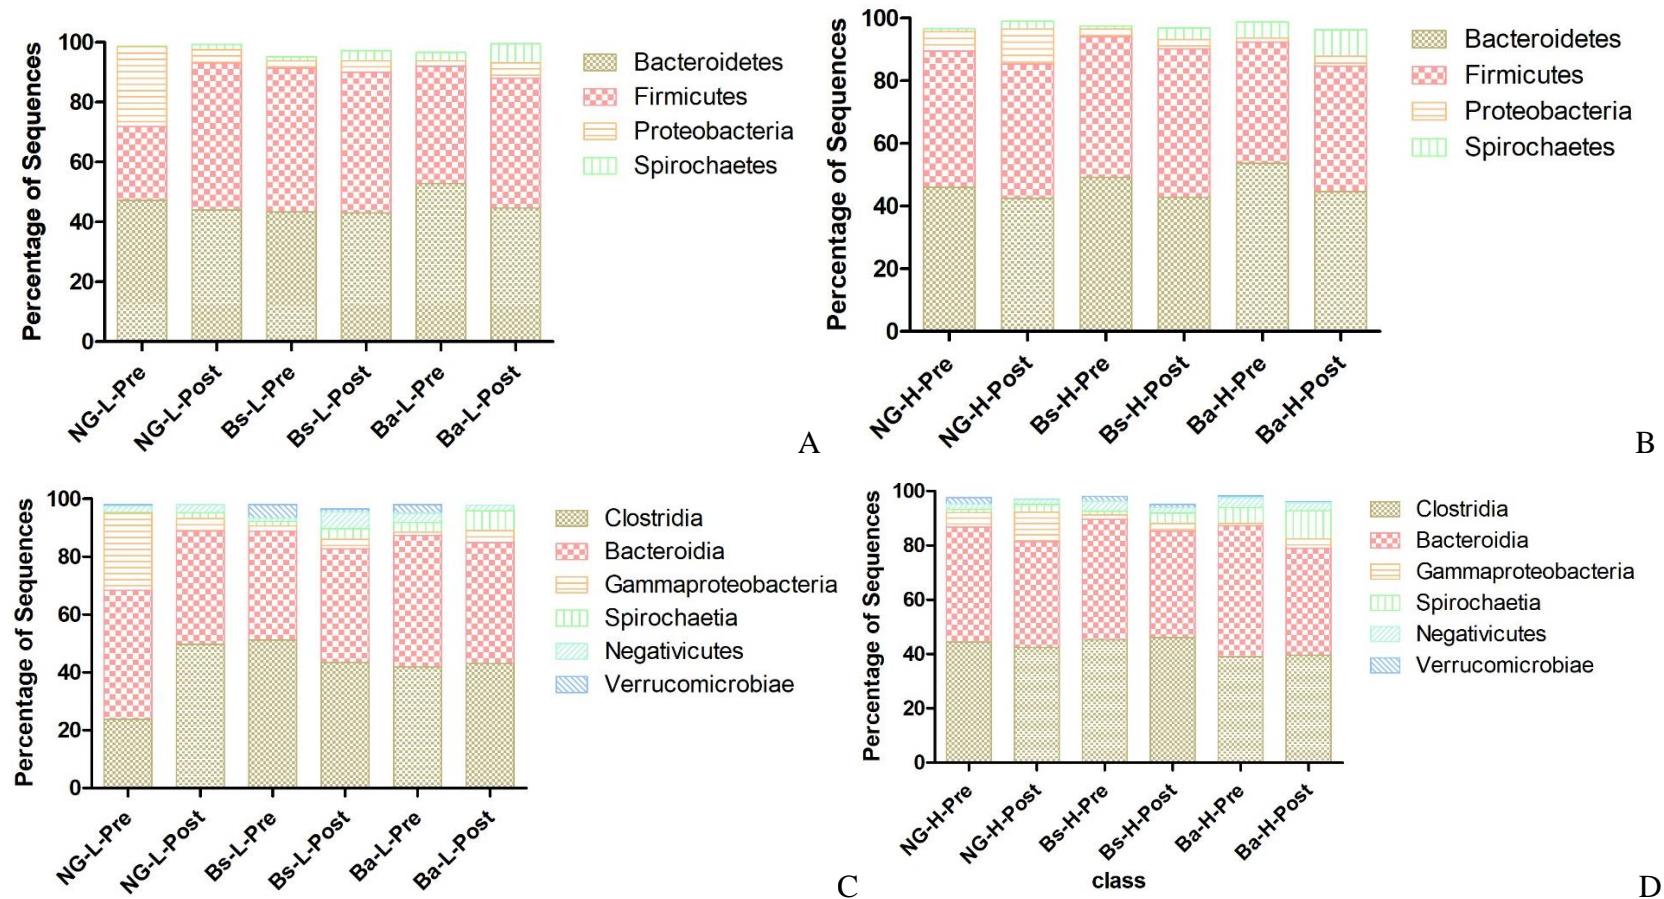

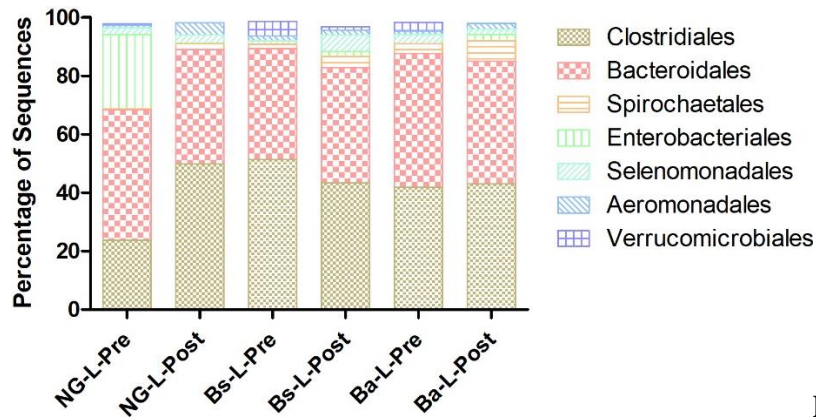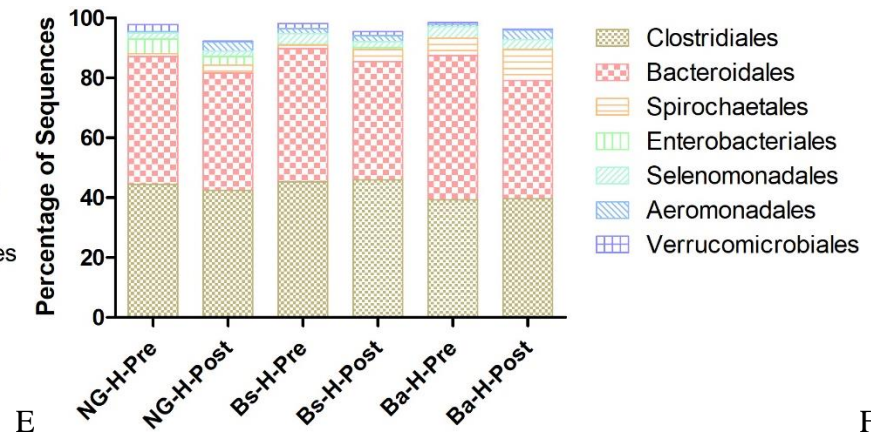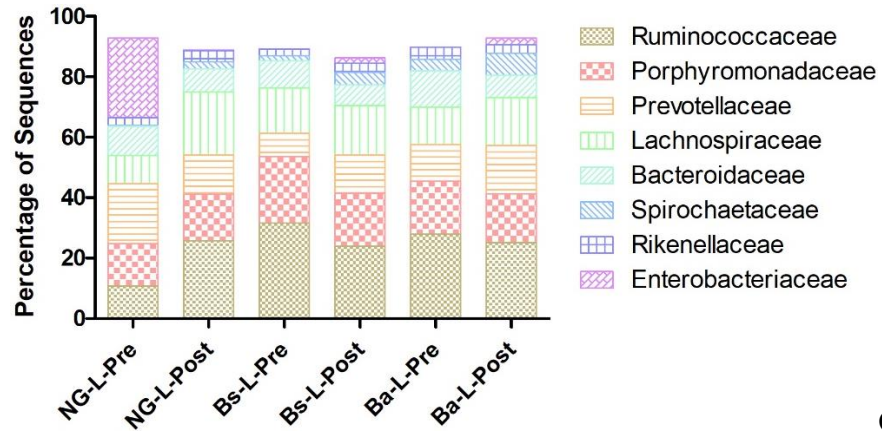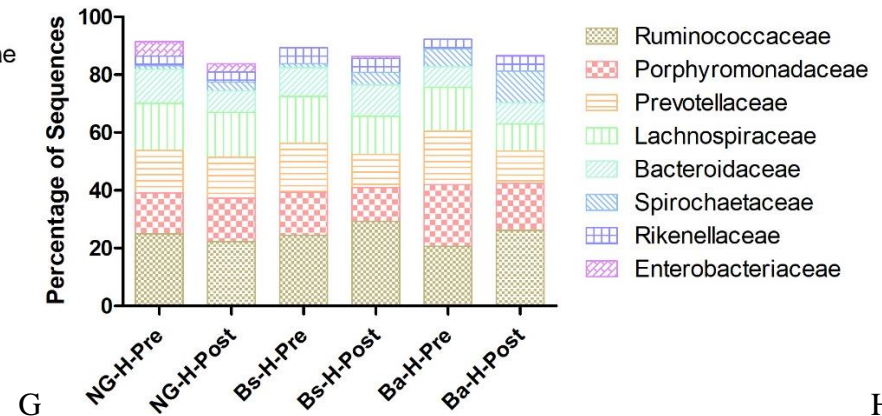

 Pre-  
 Post-

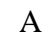

A

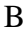

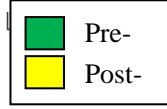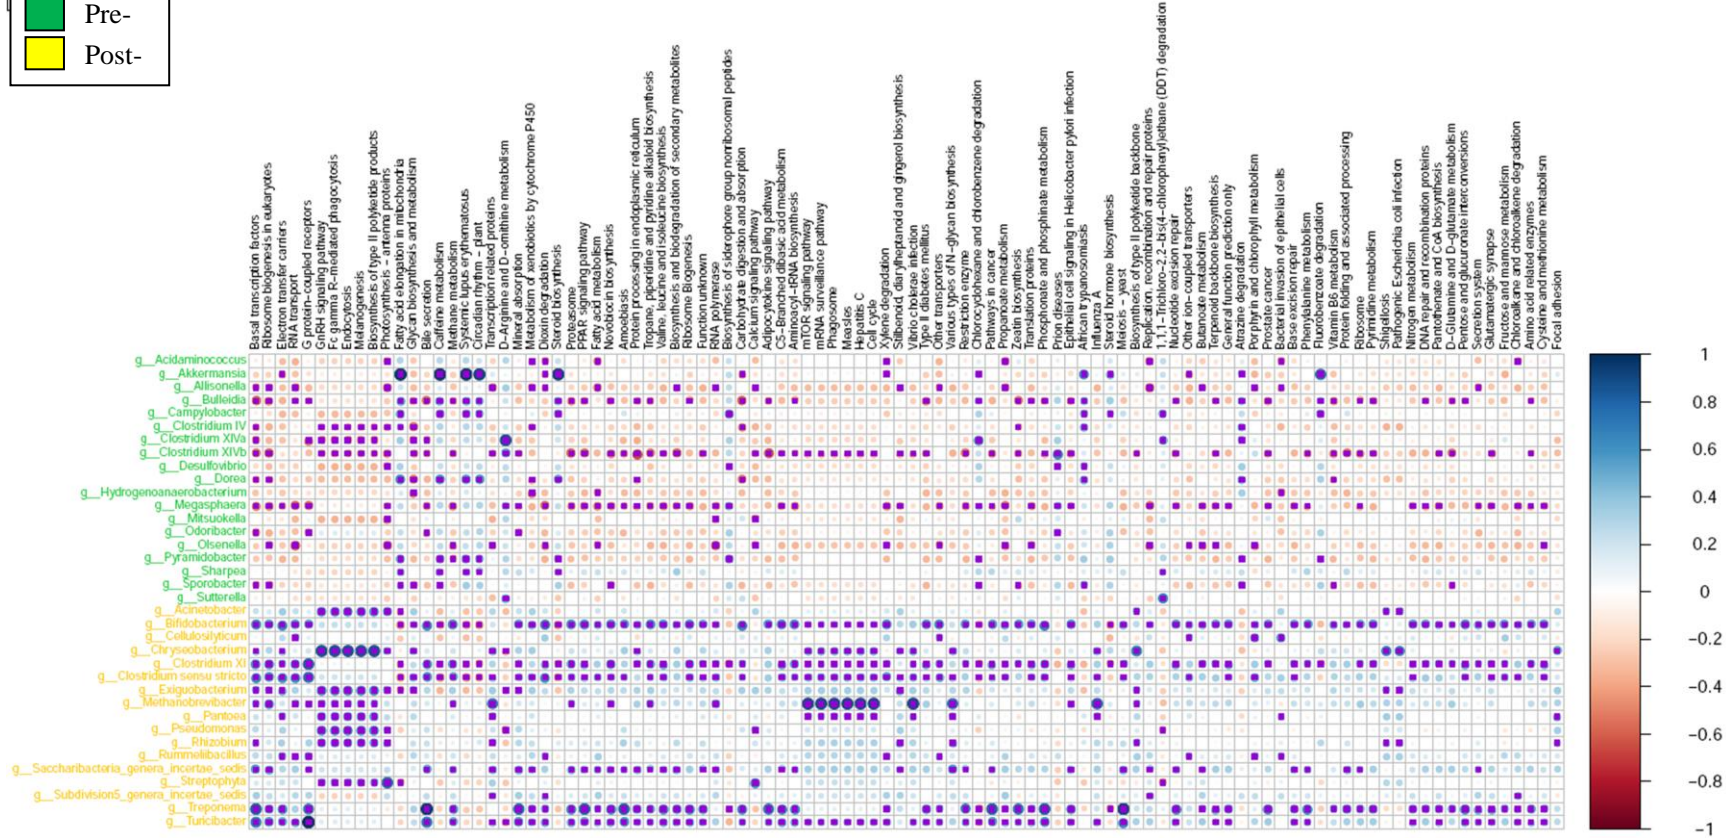

C
